# Supplementary material for: Color-tunable Al6Si2O13:Eu2+,Mn2+ phosphor with high color rendering index based on energy transfer for warm white LEDs
Source: Royal Society of Chemistry journal article supplement (doi:10.1039/c8nj03184c), 2018-01-01
Supplement: c8nj03184c1.pdf [file c8nj03184c1.pdf]

## Electronic Supplementary Information

### Color-Tunable $\text{Al}_6\text{Si}_2\text{O}_{13}:\text{Eu}^{2+},\text{Mn}^{2+}$ Phosphor with High Color Rendering Index Based on Energy Transfer for Warm White LED

Bo Yan<sup>a</sup>, Gui-Gen Wang<sup>a,b\*</sup>, Long-Fei Liu<sup>a</sup>,

You-Xiao Chen<sup>a</sup>, Jie-Cai Han<sup>a,c</sup>

<sup>a</sup> *Shenzhen Key Laboratory for Advanced Materials, Shenzhen Graduate School, Harbin Institute of Technology, Shenzhen 518055, P.R.China*

<sup>b</sup> *Centre for Programmable Materials, School of Materials Science and Engineering, Nanyang Technological University, Singapore 639798, Singapore*

<sup>c</sup> *Center for Composite Materials, Harbin Institute of Technology, Harbin 150080, P.R.China*

---

\* Corresponding author (G.G. Wang). Tel: +86-755-26629471, fax: +86-755-26033504.  
E-mail: wangguigen@hit.edu.cn

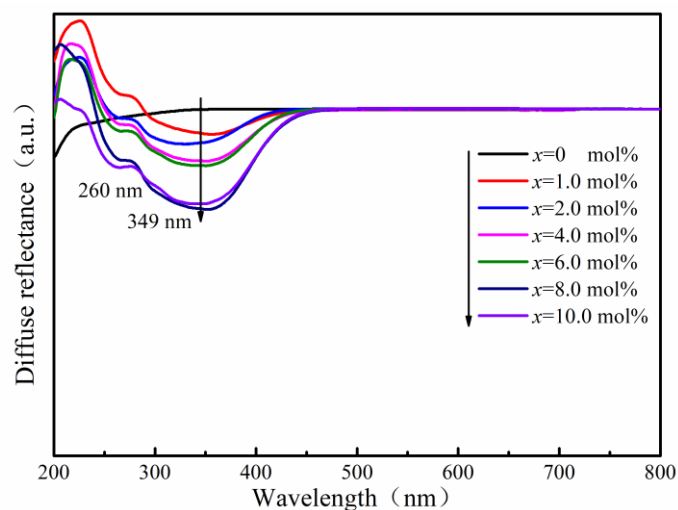

**Figure S1.** Diffuse reflection spectra of  $\text{Al}_6\text{Si}_2\text{O}_{13}:x\%\text{Eu}^{2+}$  phosphors ( $x=1.0, 2.0, 4.0, 6.0, 8.0, 10.0$ ).

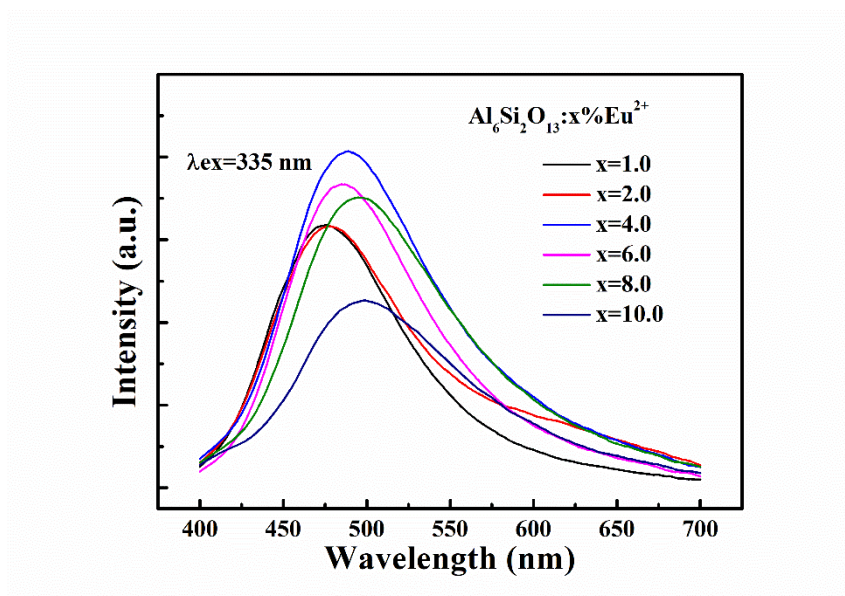

**Figure S2.** PL spectra of  $\text{Al}_6\text{Si}_2\text{O}_{13}:x\%\text{Eu}^{2+}$  phosphors ( $x=1.0, 2.0, 4.0, 6.0, 8.0, 10.0$ ) under excitation at 335 nm.

**Table S1.** Fitting results of luminescence decay curves for  $\text{Al}_6\text{Si}_2\text{O}_{13}:2\%\text{Eu}^{2+},y\%\text{Mn}^{2+}$  phosphors.

| $\text{Al}_6\text{Si}_2\text{O}_{13}:2\%\text{Eu}^{2+},y\%\text{Mn}^{2+}$ | Fitting parameters |          |          |          | Lifetime<br>$\tau$ ( $\mu\text{s}$ ) |
|---------------------------------------------------------------------------|--------------------|----------|----------|----------|--------------------------------------|
|                                                                           | $A_1$              | $A_2$    | $\tau_1$ | $\tau_2$ |                                      |
| y=0                                                                       | 2468.949           | 2301.199 | 0.5095   | 1.4987   | 1.23                                 |
| y=0.3                                                                     | 2508.218           | 1883.681 | 0.3929   | 1.3663   | 1.10                                 |
| y=0.6                                                                     | 2635.657           | 1734.295 | 0.2819   | 1.2158   | 0.97                                 |
| y=0.9                                                                     | 2730.769           | 1466.817 | 0.2748   | 1.1871   | 0.91                                 |

**Table S2.** Full set of 15 CRIs and the average CRI (Ra) values of as-prepared  $\text{Al}_6\text{Si}_2\text{O}_{13}:2\%\text{Eu}^{2+},0.6\%\text{Mn}^{2+}$  phosphor.

|           |            |            |            |            |            |            |           |
|-----------|------------|------------|------------|------------|------------|------------|-----------|
| <b>R1</b> | <b>R2</b>  | <b>R3</b>  | <b>R4</b>  | <b>R5</b>  | <b>R6</b>  | <b>R7</b>  | <b>R8</b> |
| 95        | 93         | 90         | 93         | 94         | 90         | 92         | 94        |
| <b>R9</b> | <b>R10</b> | <b>R11</b> | <b>R12</b> | <b>R13</b> | <b>R14</b> | <b>R15</b> | <b>Ra</b> |
| 97        | 82         | 94         | 86         | 94         | 94         | 97         | 92.4      |
